# Supplementary material for: Use of an Alignment-Free Method for the Geographical Discrimination of GTPVs Based on the GPCR Sequences
Source: MDPI journal article supplement (doi:10.3390/microorganisms9040855), 2021-04-16
Supplement: s1 [file s1]

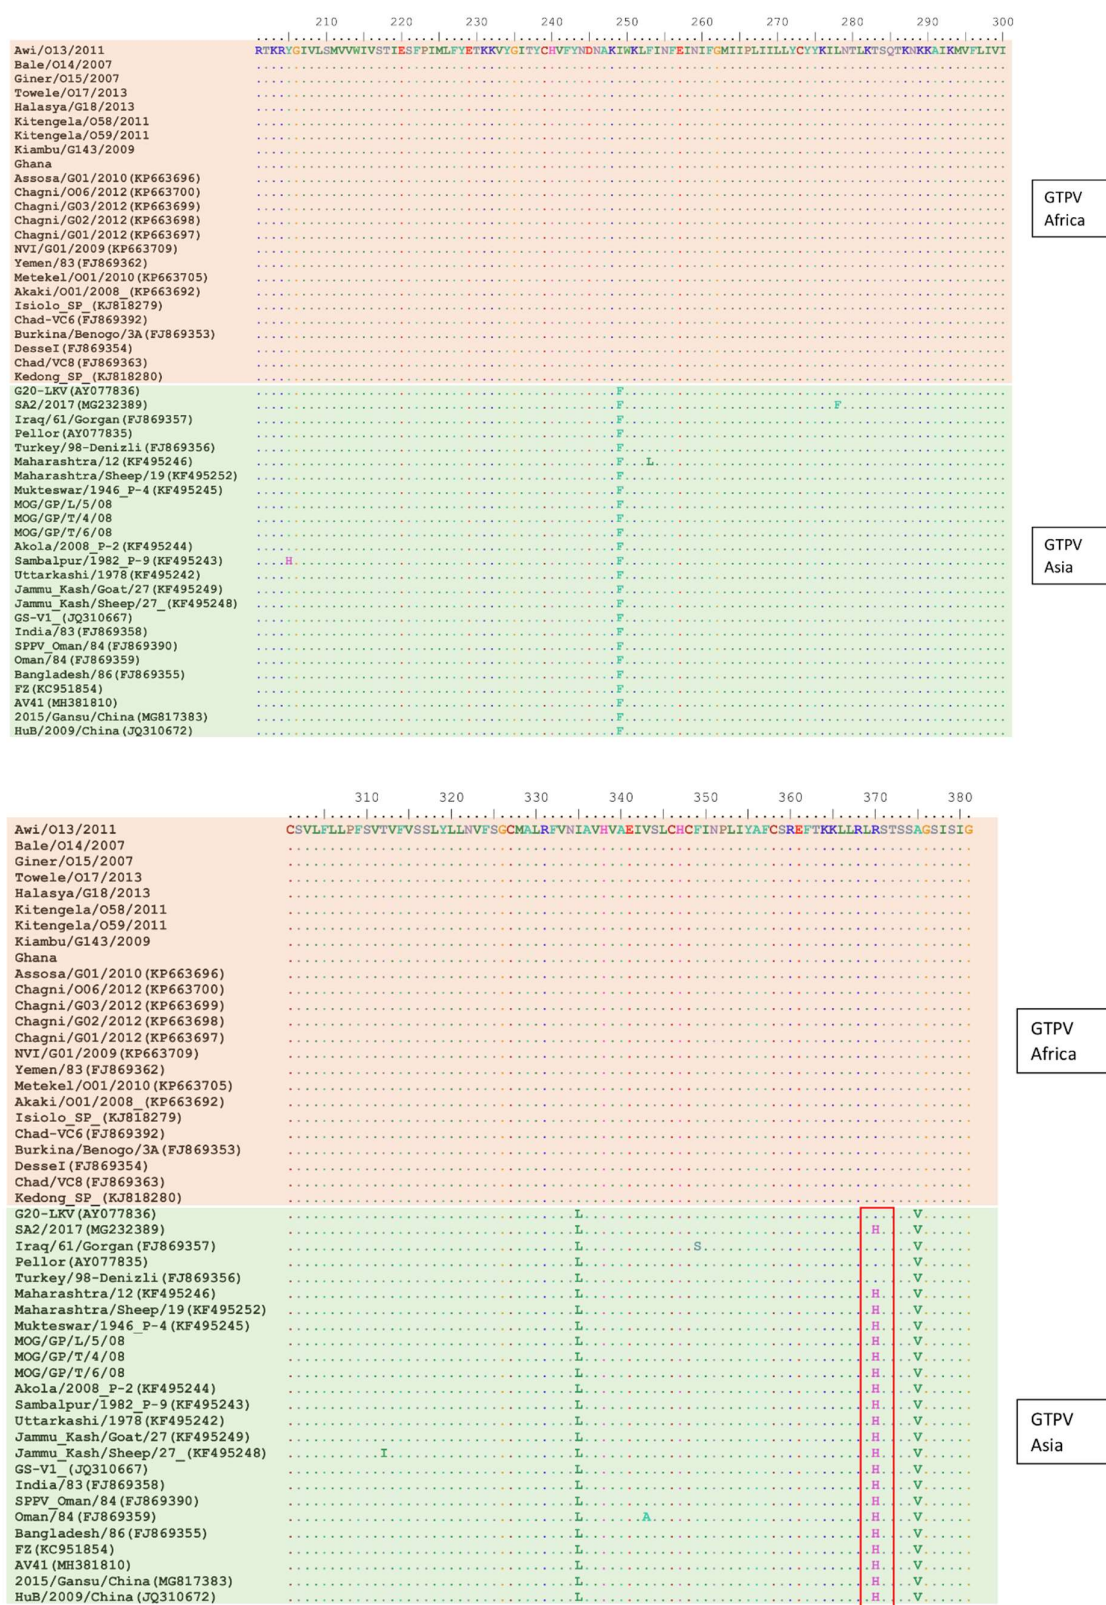

**Figure S3.** Multiple sequence alignment of the complete amino acid sequences of the GPCR of 49 GTPVs from various geographical locations.
