# Supplementary material for: Use of an Alignment-Free Method for the Geographical Discrimination of GTPVs Based on the GPCR Sequences
Source: MDPI journal article supplement (doi:10.3390/microorganisms9040855), 2021-04-16
Supplement: s1 [file s1]

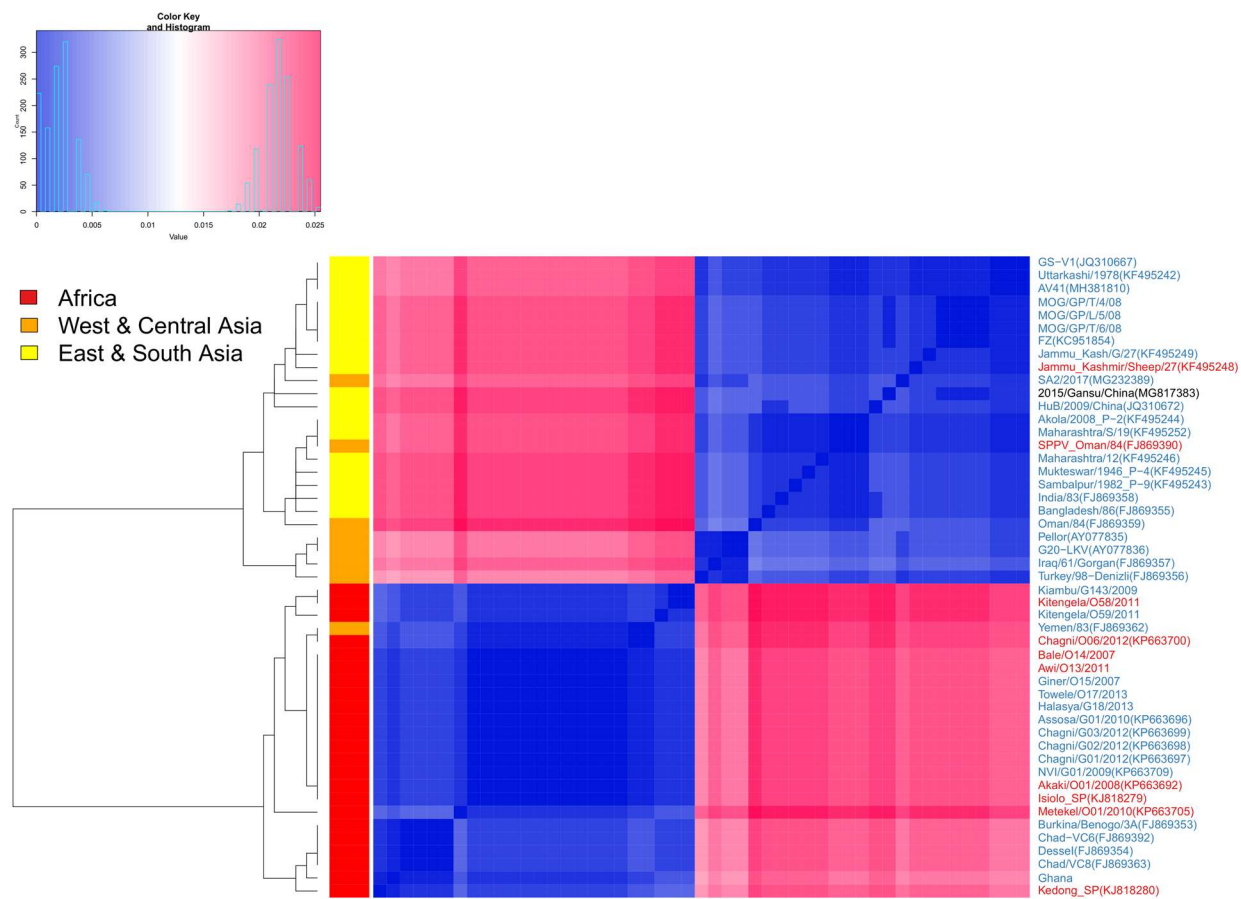

**Figure S1.** The heatmap for the nucleotide's variation of 49 GTPVs based on the MLC distances. The Complete-linkage clustering method was used to re-order the sequences. The vertical side colors indicate the origin of the samples (red for Africa, orange for West and Central Asia, yellow for East and South Asia).
